# Supplementary material
Source: PubMed Central journal article supplement (PMC4378160)

**Histogram of Correlations**

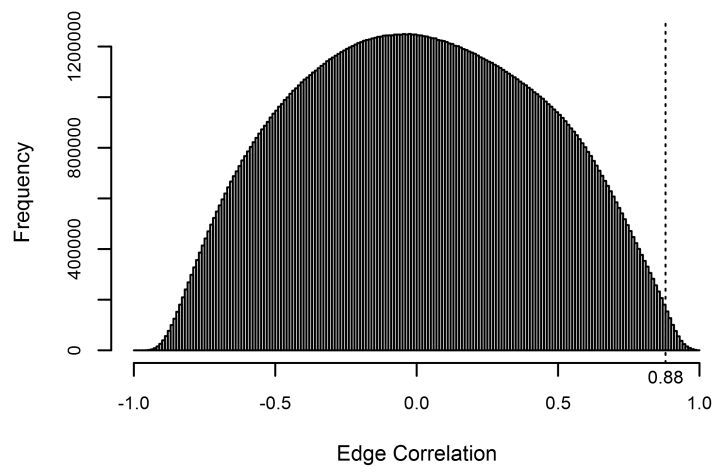

Supplement: supp_pp.114.253807_253807File_S5_AntherNet_HistCorr.pdf [file supp_pp.114.253807_253807File_S5_AntherNet_HistCorr.pdf]
